# Supplementary material for: The destructive mechanism of Aβ1–42 protofibrils by norepinephrine revealed via molecular dynamics simulations
Source: Royal Society of Chemistry journal article supplement (doi:10.1039/d2cp01754g), 2022-01-01
Supplement: d2cp01754g1.pdf [file d2cp01754g1.pdf]

## **Destructive Mechanism of A $\beta$ <sub>1-42</sub> Protofibril by Norepinephrine revealed via Molecular Dynamics Simulations**

*Duo Gao<sup>a</sup>, Jiaqian Wan<sup>a</sup>, Yu Zou<sup>b</sup>, Yehong Gong<sup>c</sup>, Xuwei Dong<sup>d</sup>, Zhengdong Xu<sup>a</sup>, Jiaxing Tang<sup>a</sup>, Guanghong Wei<sup>d,\*</sup> and Qingwen Zhang<sup>a,\*</sup>*

a School of Physical Education, Shanghai University of Sport, Shanghai 200438, People's Republic of China

b Department of Sport and Exercise Science, College of Education, Zhejiang University, Hangzhou 310058, People's Republic of China

c School of Sports Science and Engineering, East China University of Science and Technology, 130 Mei Long Road, Shanghai, 200237, People's Republic of China

d Department of Physics, State Key Laboratory of Surface Physics, and Key Laboratory for Computational Physical Sciences (Ministry of Education), Fudan University, Shanghai 200438, People's Republic of China

### **Corresponding Author**

\* E-mail: ghwei@fudan.edu.cn (G.W.)

\* E-mail: zqw@sus.edu.cn (Q.Z.)

This material contains four figures: the correlations between A $\beta$ <sub>1-42</sub> protofibril experimental NMR chemical shift (C $\alpha$ /C $\beta$  atoms) and simulated chemical shift data (Figure S1), the J-coupling ( $^3J(\text{H}_\text{N}, \text{H}_\alpha)$ ) constants values of A $\beta$ <sub>42</sub> residues calculated from 5OQV and those from simulation-generated conformational ensembles of A $\beta$ <sub>1-42</sub> protofibril system (Figure S2), the secondary structure probabilities of A $\beta$ <sub>1-42</sub> protofibril in the A $\beta$  and A $\beta$ +NE<sup>0</sup> systems (Figure S3), the average number of  $\pi$ - $\pi$  stacking between the aromatic residues of A $\beta$ <sub>1-42</sub> protofibril and NE<sup>+</sup>/NE<sup>0</sup> (Figure S4), and the interchain contact number of A $\beta$ <sub>1-42</sub> protofibril in the absence and presence of NE (in protonated and deprotonated states) (Figure S5).

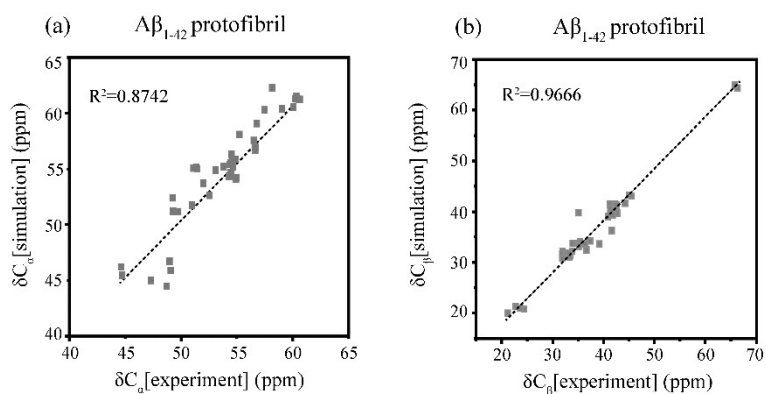

**Figure S1.** Conformational comparison between experimental data and simulated data. (a–b) Correlations between experimental NMR chemical shift data for C<sub>α</sub> and C<sub>β</sub> atoms and simulated chemical shift data for the Aβ<sub>1-42</sub> protofibril system.

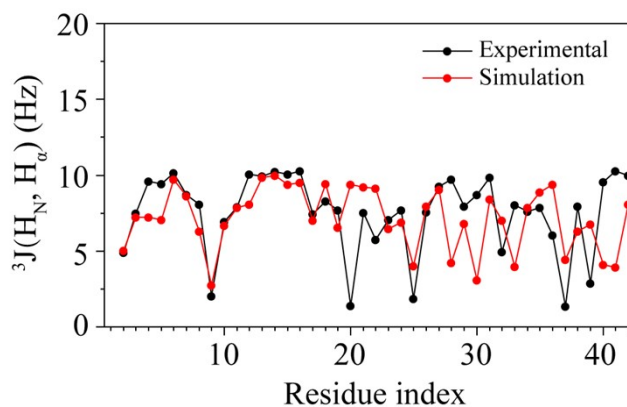

**Figure S2.** The J-coupling (<sup>3</sup>J(H<sub>N</sub>, H<sub>α</sub>)) constants values of Aβ<sub>42</sub> residues calculated from 5OQV and those from simulation-generated conformational ensembles of Aβ<sub>1-42</sub> protofibril system.

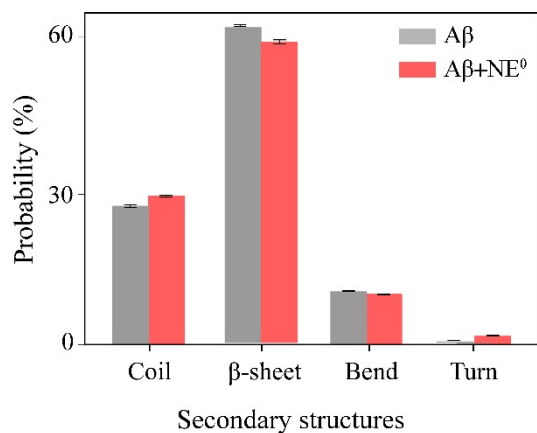

**Figure S3.** Secondary structure probabilities of Aβ<sub>1-42</sub> protofibril in the Aβ and Aβ+NE<sup>0</sup> systems.

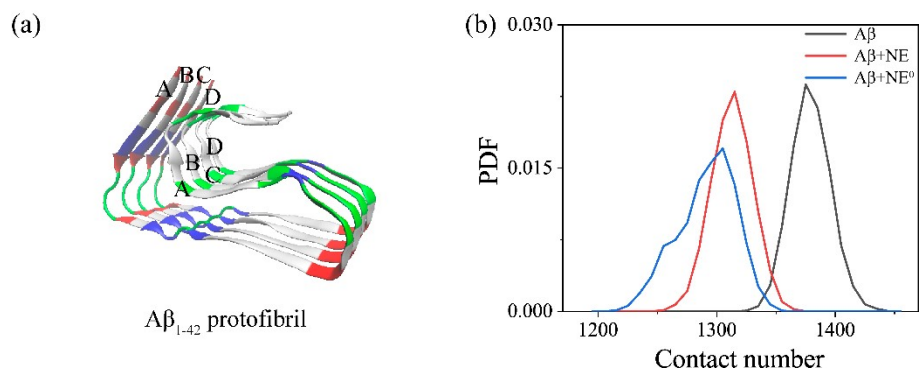

**Figure S4.** The LS-shaped configuration of  $A\beta_{1-42}$  protofibril shown in (a). The ABCD is used to indicate four chains of  $A\beta_{1-42}$  protofibril. (b) The interchain contact number of  $A\beta_{1-42}$  protofibril in the absence and presence of NE (in protonated and deprotonated states). The interchain contact were averaged over the three pairs of neighboring chains (i.e. chain A-chain B, chain B-chain C and chain C-chain D).

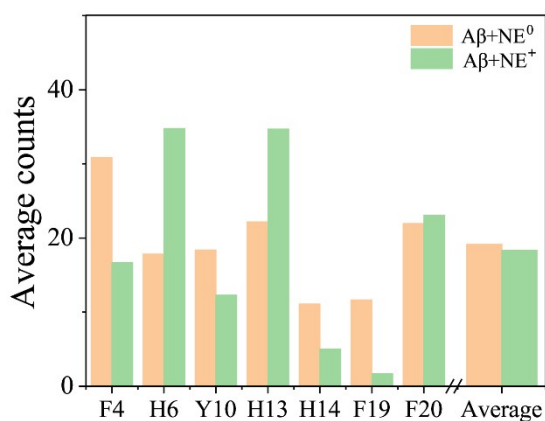

**Figure S5.** Average number of  $\pi$ - $\pi$  stacking between the aromatic residues of  $A\beta_{1-42}$  protofibril and  $NE^+/NE^0$ .
